# Supplementary material for: Tailoring co-doping of cobalt and nitrogen in a fullerene-based carbon composite and its effect on the supercapacitive performance
Source: Royal Society of Chemistry journal article supplement (doi:10.1039/d1ma00937k), 2021-12-07
Supplement: d1ma00937k1.pdf [file d1ma00937k1.pdf]

## *Supporting Information*

### **Tailoring Co-Doping of Cobalt and Nitrogen in Fullerene-Based Carbon Composite and Its Effect for Supercapacitive Performance**

Bohong Jiang,<sup>a#</sup> Guangpu Zhang,<sup>b#</sup> Qin Tang,<sup>c</sup> Fancang Meng,<sup>a</sup> Dechun Zhou,<sup>a</sup> Wenli Zhao,<sup>a</sup> Wei Jiang,<sup>b\*</sup> Qingmin, Ji<sup>a\*</sup>

<sup>a</sup> *Herbert Gleiter Institute for Nanoscience, School of Materials Science and Engineering, Nanjing University of Science & Technology, 200 Xiaolingwei, Nanjing, 210094, China*

<sup>b</sup> *National Special Superfine Powder Engineering Technology Research Center, Nanjing University of Science and Technology, 200 Xiaolingwei, Nanjing, 210094, China*

<sup>c</sup> *School of Chemistry and Chemical Engineering, Yancheng Institute of Technology, No. 1 Mid. Xiwang Avenue, Yancheng, China*

<sup>#</sup> These authors contributed equally to this work

\*Corresponding author: [jiqingmin@njust.edu.cn](mailto:jiqingmin@njust.edu.cn), [superfine\\_jw@126.com](mailto:superfine_jw@126.com)

## Additional Data

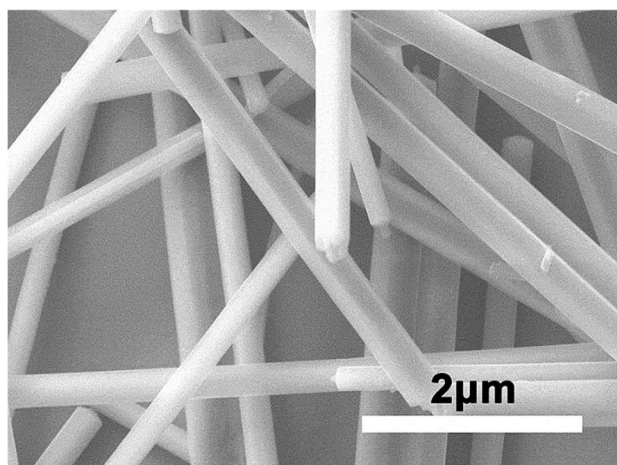

**Fig. S1.** SEM image of C<sub>60</sub>-rods by LLIP process of C<sub>60</sub>S in toluene-isopropyl alcohol solution.

**Table S1.** Structural features of C<sub>60</sub> rods and C<sub>60</sub>CoTMPP superstructures.

| Sample                                               | Morphology                           | Length (μm) | diameter (μm) |
|------------------------------------------------------|--------------------------------------|-------------|---------------|
| C <sub>60</sub> -rod (assembled structure from bare) | Long rod                             | 10          | 0.15-0.40     |
| C <sub>60</sub> CoTMPP-0.2                           | Short rods with polyprism structure  | 2.5         | 0.9           |
| C <sub>60</sub> CoTMPP-0.1                           | Microsphere with lamellar structures |             | 1.9           |
| C <sub>60</sub> CoTMPP-0.05                          | Short rod                            | 2.3         | 1.2           |

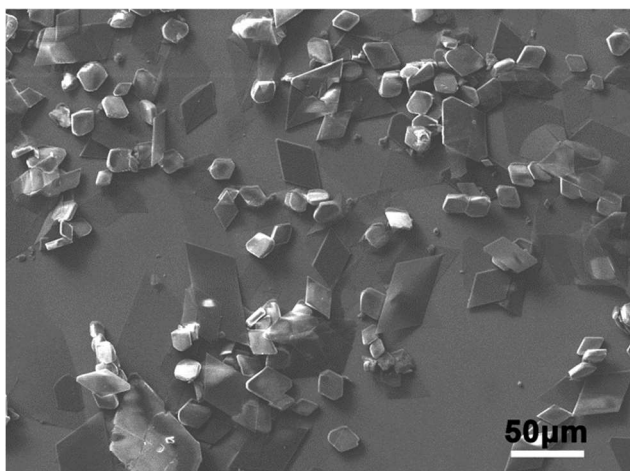

**Fig. S2.** SEM image of CoTMPP crystals formed in toluene-isopropyl alcohol solution.

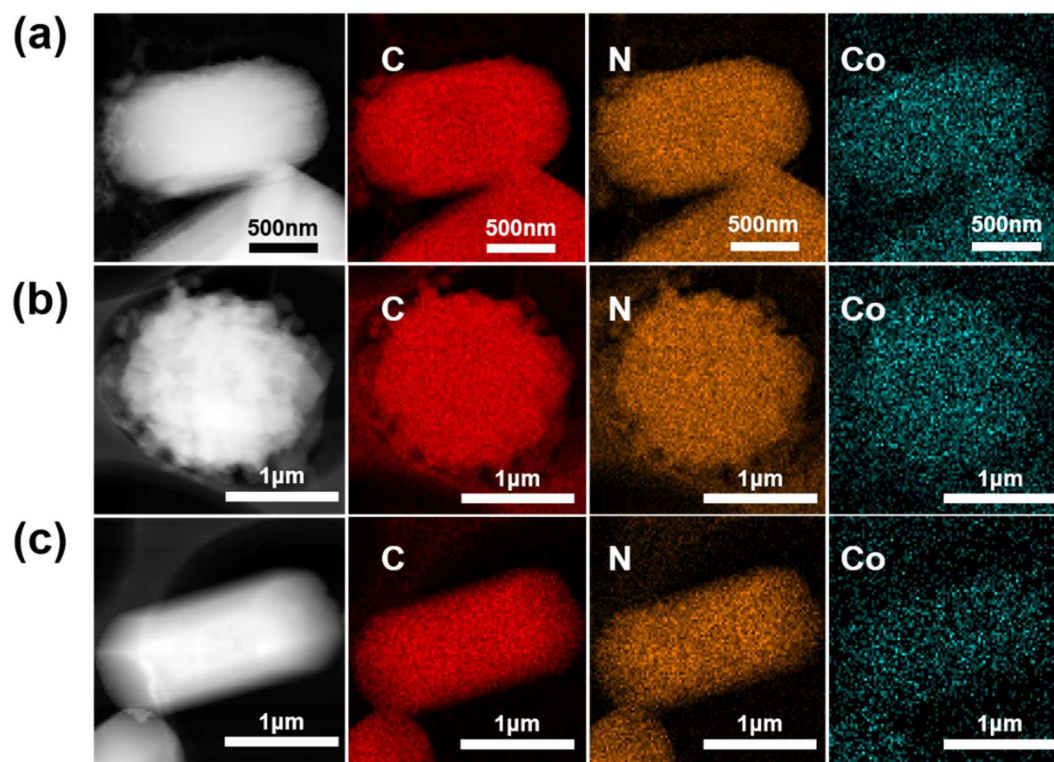

**Fig. S3.** STEM images and the corresponding elemental mapping images of C<sub>60</sub>CoTMPP crystals. (a) C<sub>60</sub>CoTMPP-0.2, (b) C<sub>60</sub>CoTMPP-0.1, (c) C<sub>60</sub>CoTMPP-0.05.

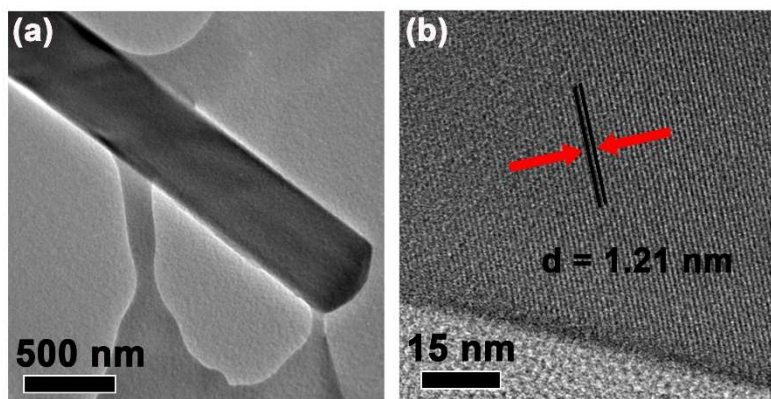

**Fig. S4.** TEM images of C<sub>60</sub> rod without CoTMPPs.

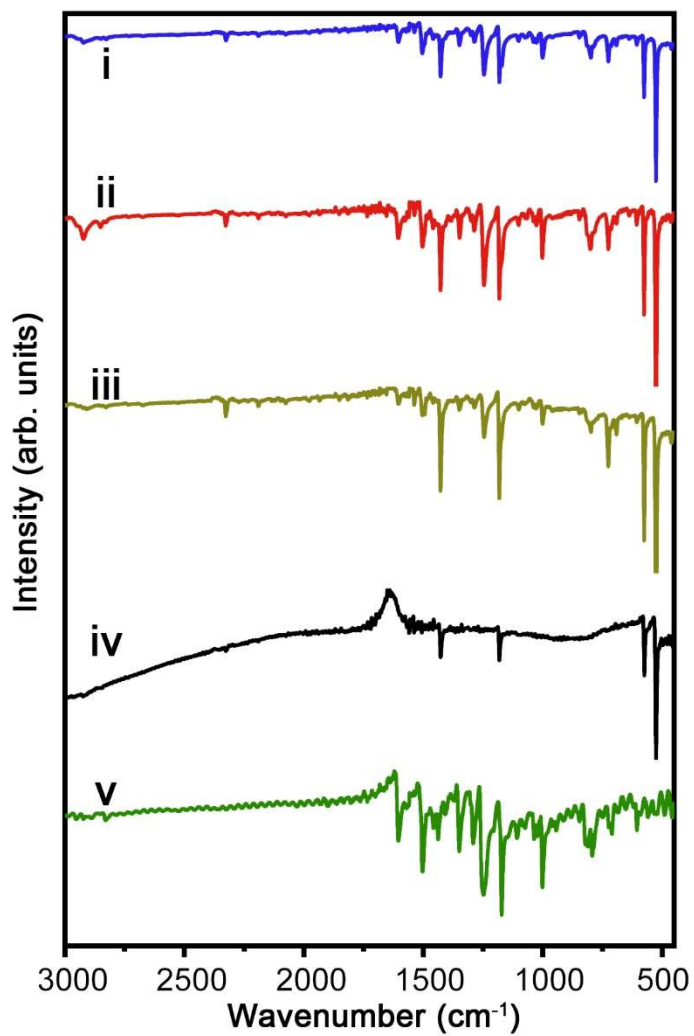

**Fig. S5.** FTIR spectra of C<sub>60</sub>CoTMPP crystals and CoTMPP. (i) C<sub>60</sub>CoTMPP-0.2, (ii) C<sub>60</sub>CoTMPP-0.1, (iii) C<sub>60</sub>CoTMPP-0.05, (iv) C<sub>60</sub>-rods, and (v) CoTMPP.

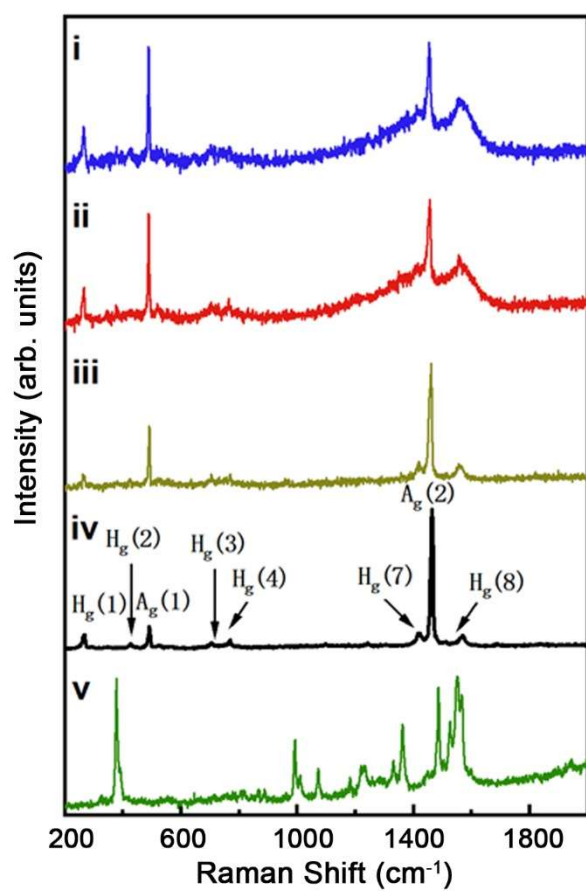

**Fig. S6.** Raman spectra of C<sub>60</sub>CoTMPP superstructures and CoTMPPs. (i) C<sub>60</sub>CoTMPP-0.2, (ii) C<sub>60</sub>CoTMPP-0.1, (iii) C<sub>60</sub>CoTMPP-0.05, (iv) C<sub>60</sub>-rods, and (v) CoTMPP.

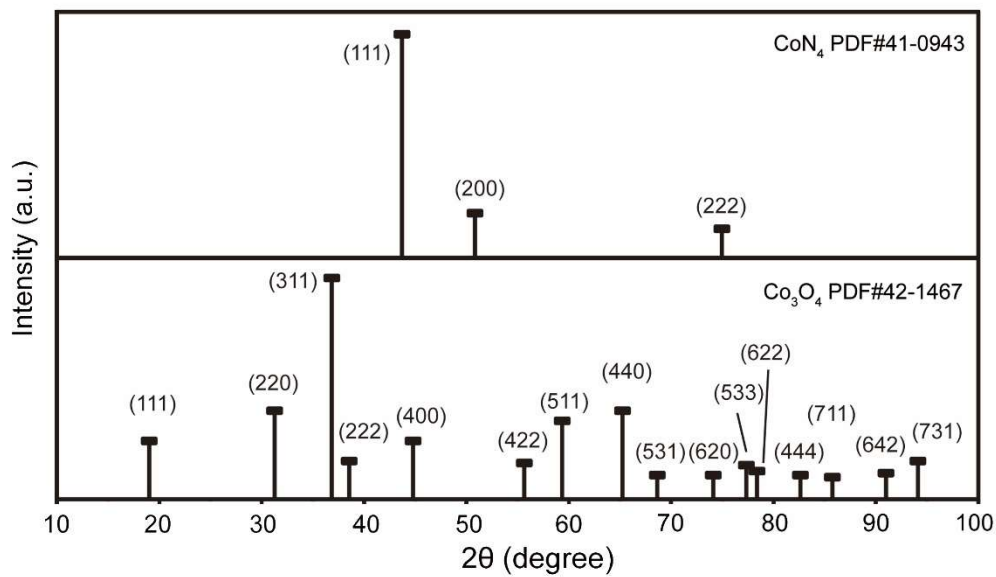

**Fig. S7.** XRD patterns of CoN<sub>4</sub> and Co<sub>3</sub>O<sub>4</sub> standard cards.



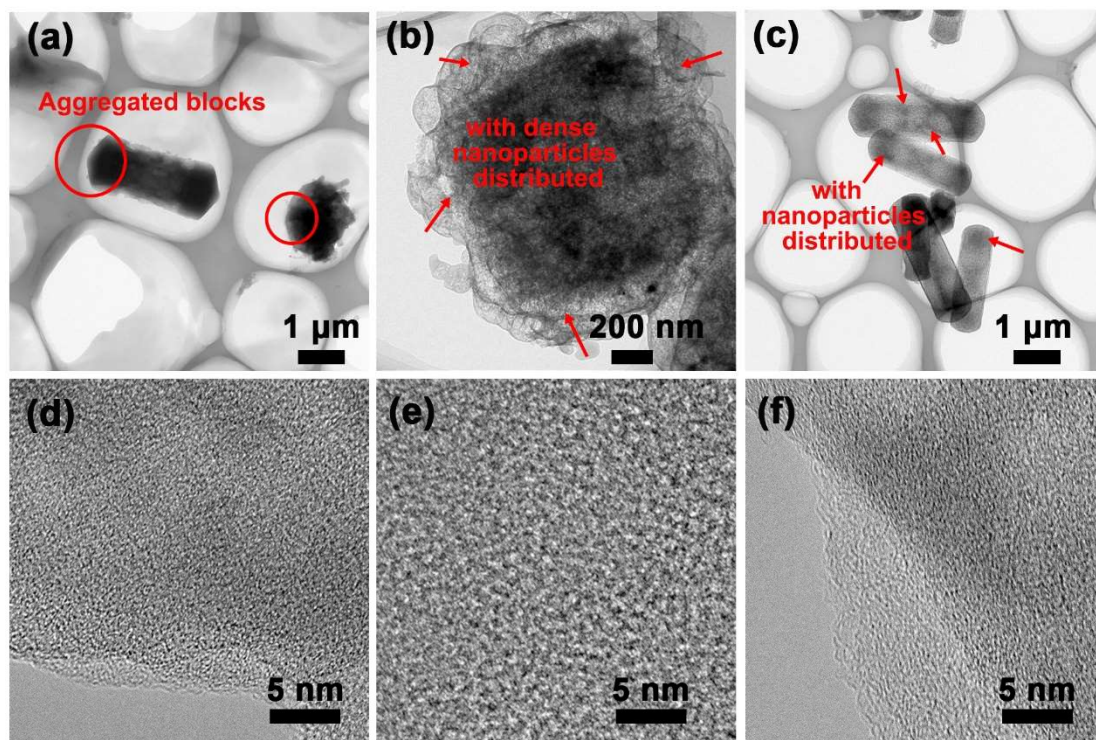

**Fig. S8.** TEM images of  $C_{60}CoTMPP_{900}$ s. (a), (d)  $C_{60}CoTMPP_{-0.2_{900}}$ ; (b), (e)  $C_{60}CoTMPP_{-0.1_{900}}$ ; (c), (f)  $C_{60}CoTMPP_{-0.05_{900}}$ .

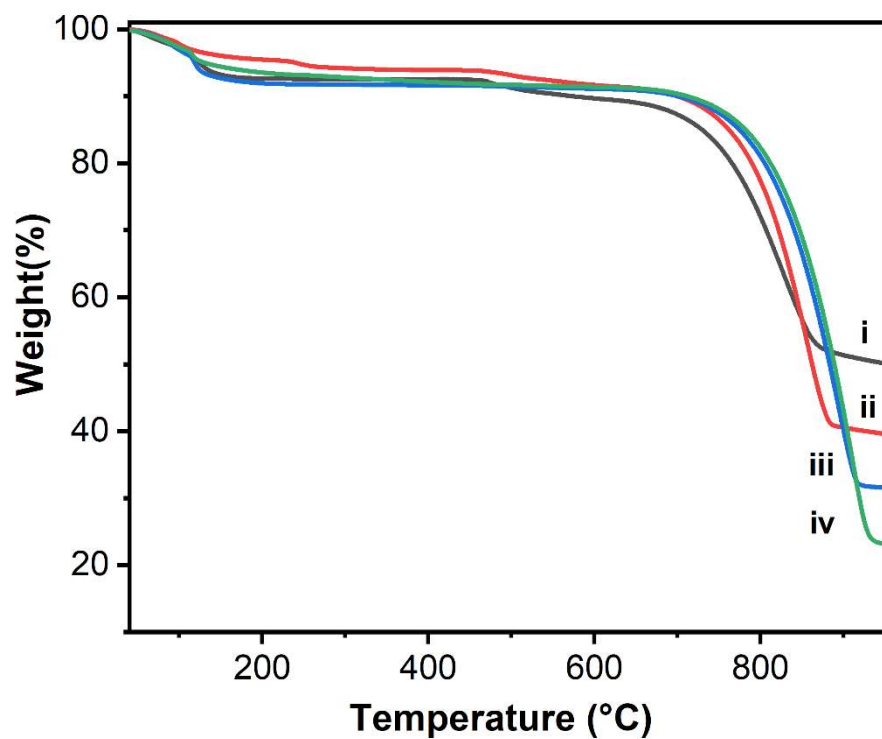

**Fig. S9.** The TGA weight loss curves of C<sub>60</sub>CoTMPPs. (i) C<sub>60</sub>CoTMPP-0.2, (ii) C<sub>60</sub>CoTMPP-0.1, (iii) C<sub>60</sub>CoTMPP-0.05, (iv) C<sub>60</sub>-rods.

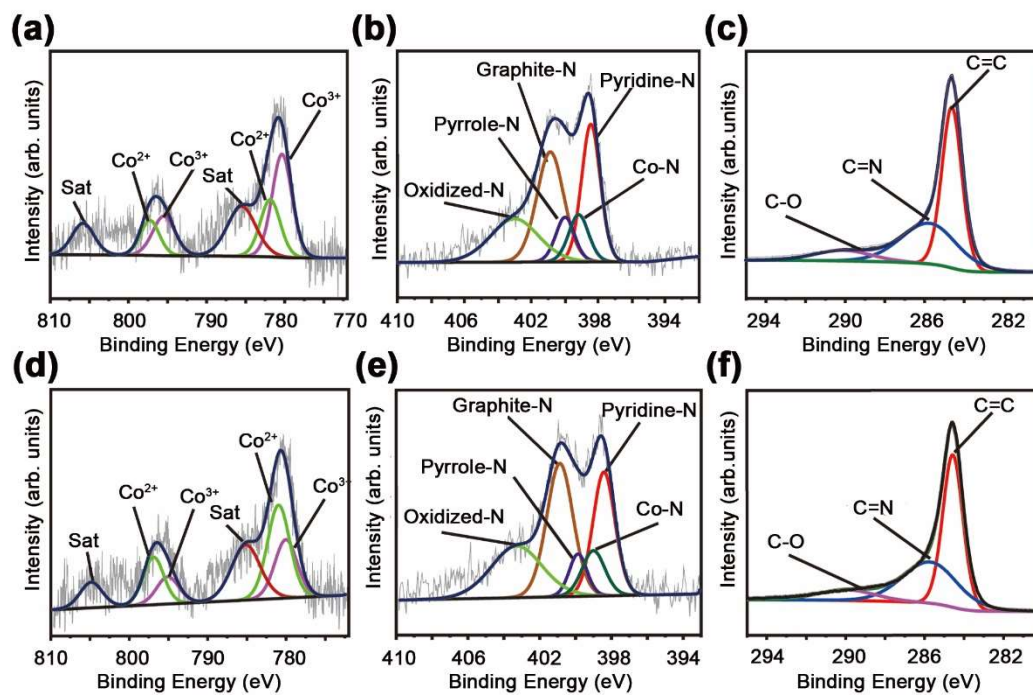

**Fig. S10.** (a) XPS Co 2p spectrum, (b) XPS N 1s spectrum, (c) XPS C 1s spectrum of C<sub>60</sub>CoTMPP-0.2\_900; (d) XPS Co 2p spectrum (e) XPS N 1s spectrum, (f) XPS C 1s spectrum of C<sub>60</sub>CoTMPP-0.05\_900.

**Table S2.** The comparison for the proportion of  $\text{Co}^{2+}$  and  $\text{Co}^{3+}$  in  $\text{C}_{60}\text{CoTMPP}_{900\text{s}}$  based on the relative area of each component peak in XPS Co 2p spectra, and the proportion of pyridine-N and Co-N in  $\text{C}_{60}\text{CoTMPP}_{900\text{s}}$  based on the relative area of each component peak in XPS N 1s spectra.

| Samples                                 | $\text{Co}^{3+}$ | $\text{Co}^{2+}$ | Pyridine-N | Co-N   |
|-----------------------------------------|------------------|------------------|------------|--------|
| $\text{C}_{60}\text{CoTMPP-0.2}_{900}$  | 44.24%           | 24.77%           | 27.35%     | 10.01% |
| $\text{C}_{60}\text{CoTMPP-0.1}_{900}$  | 24.51%           | 49.86%           | 26.49%     | 31.85% |
| $\text{C}_{60}\text{CoTMPP-0.05}_{900}$ | 26.24%           | 41.86%           | 25.53%     | 7.31%  |

**Table S3.** The Co amounts in  $\text{C}_{60}\text{CoTMPPs}$  and  $\text{C}_{60}\text{CoTMPP}_{900\text{s}}$  by ICP measurements.

| Samples                 | $\text{C}_{60}\text{CoTMPP}_{-0.05}$ | $\text{C}_{60}\text{CoTMPP}_{-0.1}$ | $\text{C}_{60}\text{CoTMPP}_{-0.2}$ | $\text{C}_{60}\text{CoTMPP}_{-0.05}_{900}$ | $\text{C}_{60}\text{CoTMPP}_{-0.1}_{900}$ | $\text{C}_{60}\text{CoTMPP}_{-0.2}_{900}$ |
|-------------------------|--------------------------------------|-------------------------------------|-------------------------------------|--------------------------------------------|-------------------------------------------|-------------------------------------------|
| Co mass%<br>by ICP      | 0.26                                 | 0.57                                | 1.26                                | 0.30                                       | 0.71                                      | 1.52                                      |
| Theoretical<br>Co mass% | 0.38                                 | 0.73                                | 1.34                                | -                                          | -                                         | -                                         |

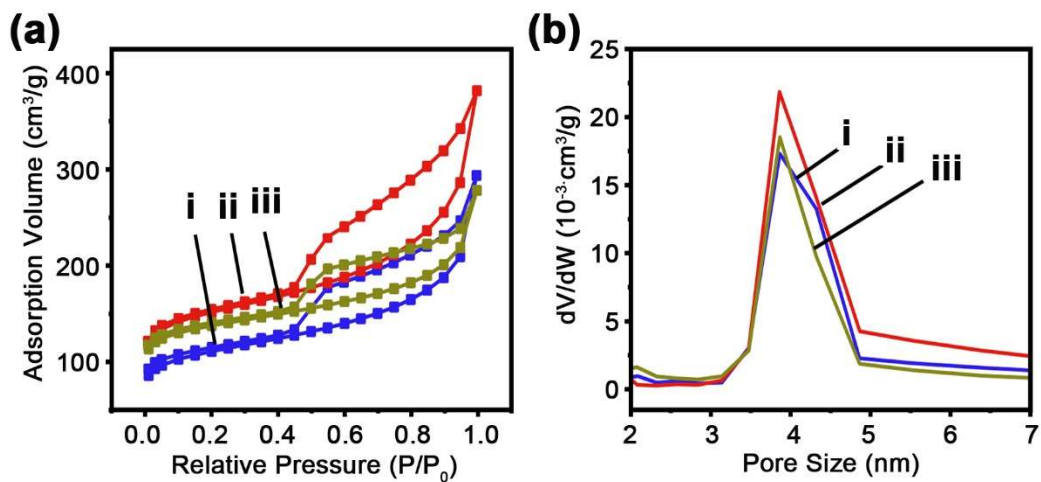

**Fig. S11.** (a) Nitrogen isotherms and (b) pore size distributions of the  $C_{60}CoTMPP\_900s$  (i)  $C_{60}CoTMPP-0.2\_900$ , (ii)  $C_{60}CoTMPP-0.1\_900$ , (iii)  $C_{60}CoTMPP-0.05\_900$ .

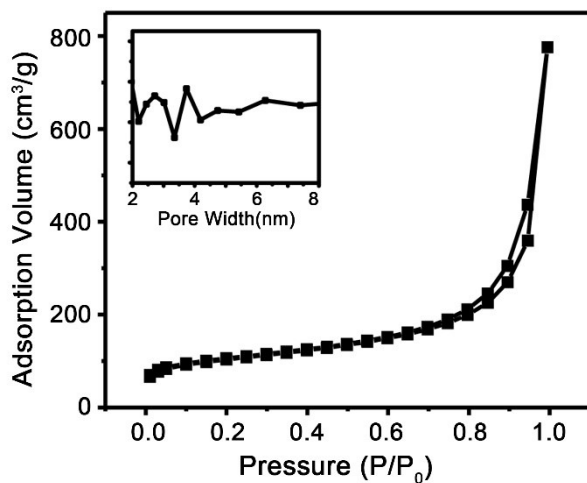

**Fig. S12.** Nitrogen isotherms and pore size distribution (inset) of the  $C_{60}\_900$  (rod morphology).

**Table S4.** The porous features of C<sub>60</sub>\_900 and various C<sub>60</sub>CoTMPP\_900s.

| Sample                          | BET surface area (m <sup>2</sup> /g) | Average Pore size (nm) | Pore volume (cm <sup>3</sup> /g) |
|---------------------------------|--------------------------------------|------------------------|----------------------------------|
| C <sub>60</sub> _900            | 287                                  | 2.3                    | 0.059                            |
| C <sub>60</sub> CoTMPP-0.2_900  | 365                                  | 3.9                    | 0.094                            |
| C <sub>60</sub> CoTMPP-0.1_900  | 496                                  | 3.9                    | 0.143                            |
| C <sub>60</sub> CoTMPP-0.05_900 | 446                                  | 3.9                    | 0.142                            |

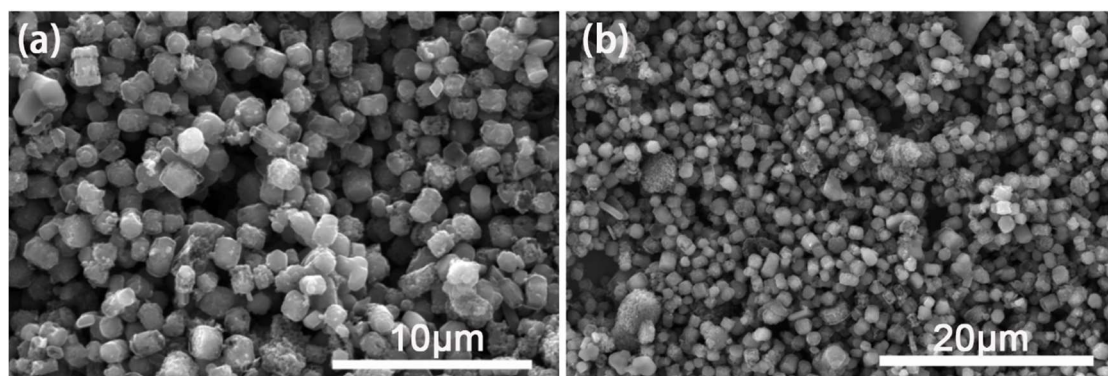

**Fig. S13.** SEM images of the C<sub>60</sub>CoTMPP-0.1\_900 on the electrode surface.

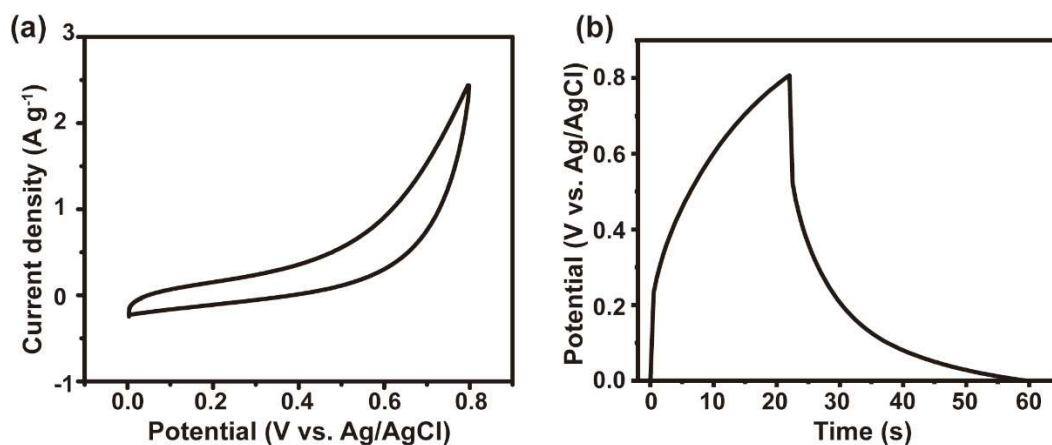

**Fig. S14.** (a) CV curve of C<sub>60</sub>\_900 at the scan rate of 10 mV·s<sup>-1</sup>, (b) CD curve of C<sub>60</sub>\_900 at 1A·g<sup>-1</sup>.

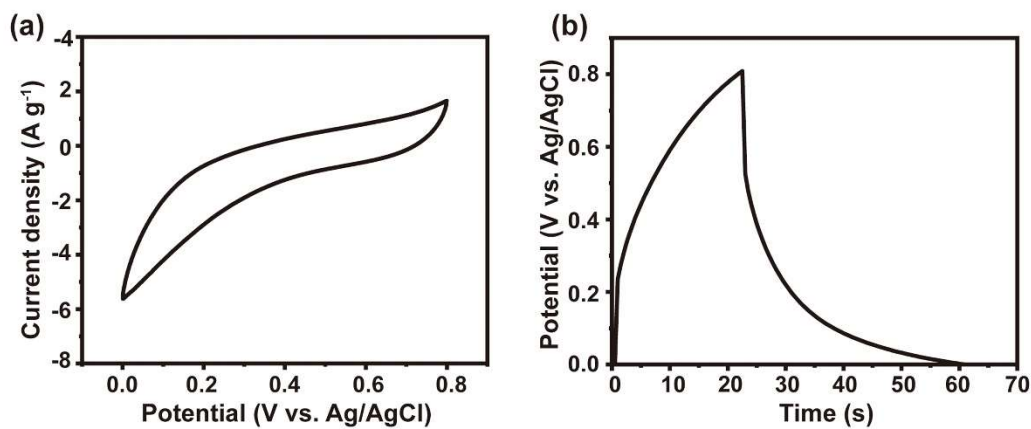

**Fig. S15.** (a) CV curve of C<sub>60</sub>CoTMPP-0.1\_700 at the scan rate of 10 mV·s<sup>-1</sup>, (b) CD curve of C<sub>60</sub>CoTMPP-0.1\_700 at 1A·g<sup>-1</sup>.

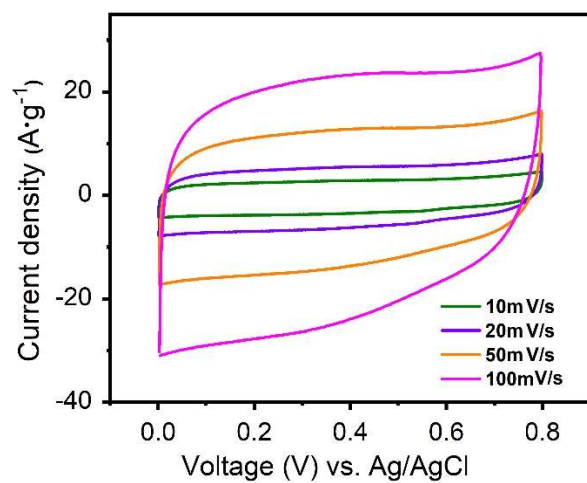

**Fig. S16.** CV curves of C<sub>60</sub>CoTMPP-0.1\_900 at different scan rates (10–100 mV·s<sup>-1</sup>).



**Table S5.** The comparison of the supercapacitor performance with various reported fullerene-derived carbon materials.

| Materials                                   | CD     |       | CV    |        | Ref.      |
|---------------------------------------------|--------|-------|-------|--------|-----------|
|                                             | (F/g)  | (A/g) | (F/g) | (mA/s) |           |
| C <sub>60</sub> nanosheet                   | -      | -     | 12.7  | 5      | 1         |
| MF C <sub>60</sub>                          | 141    | 0.5   | -     | -      | 2         |
| HT-FNT_2000(C <sub>60</sub> )               | -      | -     | 145   | 5      | 3         |
| HT-FNR_2000(C <sub>60</sub> )               | -      | -     | 132   | 5      | 3         |
| Fe-MFC <sub>60</sub> -150                   | 112.4  | 0.1   | -     | -      | 4         |
| FCL700 (C <sub>60</sub> )                   | 505.4  | 0.1   | -     | -      | 5         |
| MCFC-900 (C <sub>70</sub> )                 | 205    | 1     | 286   | 5      | 6         |
| HTFT_2000(C <sub>70</sub> )                 | -      | -     | 212   | 5      | 6         |
| HTFT_900(C <sub>70</sub> )                  | -      | -     | 26.4  | 5      | 7         |
| MC <sub>60</sub> @C-1.33                    | 213    | 0.5   |       |        | 8         |
| 200-HTC-800                                 |        |       | 2995  | 40     | 9         |
| C <sub>60</sub> FcC <sub>60</sub> -8IPA_900 | 129    | 1     | 102.5 | 10     | 10        |
| C <sub>60</sub> CoTMPP-0.1_900              | 416.31 | 1     | 296   | 10     | this work |

## References (in Table S5)

1. L. K. Shrestha, Y. Yamauchi, J. P. Hill, K. Miyazawa, K. Ariga, *J. Am. Chem. Soc.*, 2013, **135**, 586-589.
2. M. Benzigar, S. Joseph, H. Ilbeygi, D. H. Park, S. Sarkar, G. Chandra, S. Umopathy, S. Srinivasan, S. Talapaneni, A. Vinu, *Angew. Chem. Int. Edit.*, 2018, **57**, 569-573.
3. L. K. Shrestha, R. G. Shrestha, Y. Yamauchi, J. P. Hill, T. Nishimura, K.

- Miyazawa, T. Kawai, S. Okada, K. Wakabayashi, K. Ariga, *Angew. Chem. Int. Edit.*, 2015, **54**, 951-955.
4. M. R. Benzigar, S. Joseph, G. Saianand, A. I. Gopalan, A. Vinu, *Micropor. Mesopor. Mat.*, 2019, **285**, 21-31.
  5. Z. Peng, Y. Hu, J. Wang, S. Liu, C. Li, Q. Jiang, J. Lu, X. Zeng, P. Peng, F. F. Li, *Adv. Energy Mater.*, 2019, **9**, 1802928.
  6. P. Baire, S. Maji, J. P. Hill, J. H. Kim, K. Ariga, L. K. Shrestha, *J. Mater. Chem. A.*, 2019, **7**, 12654-12660.
  7. P. Baire, R. G. Shrestha, J. P. Hill, T. Nishimura, K. Ariga, L.K. Shrestha, *J. Mater. Chem. A.*, 2016, **4**, 13899-13906.
  8. A. V. Baskar, A. M. Ruban, J. M. Davidraj, G. Singh, A. H. Al-Muhtaseb, J. M. Lee, J. Yi, A. Vinu, *Bull. Chem. Soc. Jpn.*, 2021, **94**, 133-140.
  9. Y. Wu, J.-P. Cao, X.-Y. Zhao, Z.-Q. Hao, Q.-Q. Zhuang, J.-S. Zhu, X.-Y. Wang, X.-Y. Wei, *Acta*, 2017, **252**, 397-407.
  10. B. Jiang, Q. Tang, W. Zhao, J. Sun, R. An, T. Niu, H. Fuchs, Q. Ji, *CrystEngComm*, 2020, **22**, 6287-6294.
